1 **Host adaptation mediated by intergenic evolution in a bacterial pathogen**

2

3 S. M. Hossein Khademi<sup>1</sup> and Lars Jelsbak<sup>1,a</sup>

4

5 <sup>1</sup> Department of Biotechnology and Biomedicine, Technical University of Denmark,

6 2800 Lyngby, Denmark

7

8 <sup>a</sup> Corresponding author: Lars Jelsbak, Department of Biotechnology and Biomedicine,

9 Technical University of Denmark, 2800 Lyngby, Denmark. Email: lj@bio.dtu.dk.

10 Telephone: +45 45256129

11

12 Keywords: intergenic evolution, *cis*-regulatory elements, bacterial adaptation, gene

13 expression, antibiotic resistance

14 **Abstract**

15 Bacterial pathogens evolve during the course of infection as they adapt to the  
16 selective pressures that confront them inside the host. Identification of adaptive  
17 mutations and their contributions to pathogen fitness remain a central challenge.  
18 Although mutations can either target intergenic or coding regions in the pathogen  
19 genome, studies of host adaptation have focused predominantly on molecular  
20 evolution within coding regions whereas the role of intergenic mutations remains  
21 unclear. Here, we address this issue and investigate the extent to which intergenic  
22 mutations contribute to the evolutionary response of pathogens to host  
23 environments, and if intergenic mutations have distinct roles in host adaptation. We  
24 characterize intergenic evolution in 44 lineages of a clinically important bacterial  
25 pathogen, *Pseudomonas aeruginosa*, as they adapt to their hosts. We identify 88  
26 intergenic regions in which parallel evolution occur. At the genetic level, we find that  
27 mutations in these regions under selection are located primarily within regulatory  
28 elements upstream of transcriptional start sites. At the functional level, we show  
29 that these mutations both create or destroy regulatory interactions in connection to  
30 transcriptional processes, and are directly responsible for evolution of important  
31 pathogenic phenotypes including antibiotic sensitivity. Importantly, we find that  
32 intergenic mutations are more likely to be selected than coding region mutations,  
33 and that intergenic mutations enable essential genes to become targets of evolution.  
34 In summary, our results highlight the evolutionary significance of intergenic  
35 mutations in creating host-adapted variants, and that intergenic and coding regions  
36 have different qualitative and quantitative contributions to this process.

37

38 **Significance**

39 Pathogens adapt to their host during infection, but the contribution and function of  
40 non-coding intergenic sequences to adaptation is poorly understood. Here, genome-  
41 wide identification of adaptive mutations within intergenic regions demonstrates  
42 that these sequences constitute an important part of the genetic basis for host  
43 adaptation. We find that intergenic mutations are abundant relative to adaptive  
44 mutations within coding sequences, and can contribute directly to evolution of  
45 pathogen relevant traits. Importantly, we find that intergenic mutations modify  
46 expression of essential genes and thus make contributions that are functionally  
47 distinct from coding mutations. These results improve our understanding of the  
48 evolutionary processes *in vivo*, and can potentially assist in refining predictions of  
49 pathogen evolution, disease outcome, and antibiotic resistance development.

50

## 51 **Introduction**

52 Bacterial pathogens evolve during infection as they adapt to the environment inside  
53 the host (1). Since the bacterial phenotypes selected *in vivo* may have profound  
54 impact on disease severity and progression (2, 3) and response to antibiotic therapy  
55 (4), identification and analysis of the full range of beneficial genetic changes that  
56 underlies host adaptation is of importance.

57 Although adaptive mutations may potentially change the sequences of either coding  
58 regions or non-translated intergenic regions to affect protein function or expression,  
59 respectively, studies of pathogen adaptation during infection of host tissues have  
60 focused predominantly on molecular evolution within coding regions whereas the  
61 role of adaptive mutations in intergenic regions has received comparably less  
62 attention. The shortage of systematic, genome-wide analyses of intergenic evolution  
63 in bacterial pathogens is surprising given the fact that these regions are home to a  
64 large number of functional elements required for expression of virulence and  
65 resistance determinants *in vivo*, and that intergenic regions are maintained by  
66 purifying selection in many bacterial species (5-7). Moreover, *cis*-regulatory  
67 mutations are known to play an important role in phenotypic evolution in  
68 eukaryotic organisms (8). Overall, it remains unclear to what extent intergenic  
69 mutations contribute to the evolutionary response of pathogens to the host  
70 environment, and if intergenic mutations have a qualitative distinct role in host  
71 adaptation.

72 There are clear, albeit few, examples of intergenic regions which evolve under  
73 selection within the host. For example, evolution of a novel regulatory interaction  
74 between the virulence regulator SsrB and the promoter of the *sfrN* gene was shown

75 to result in enhanced within-host fitness in *Salmonella* Typhimurium (9). In  
76 *Pseudomonas aeruginosa*, evolution of the intergenic region of the *phuR-phuSTUVW*  
77 genes during host colonization was shown to increase expression of the Phu heme  
78 uptake system and improve the ability of the pathogen to acquire iron from  
79 hemeoglobin (10). In *Mycobacterium tuberculosis*, evolution of ethambutol  
80 resistance has been linked to acquisition of mutations within the *empAB* promoter  
81 region that enhance expression of enzymes essential for the synthesis of cell wall  
82 arabinogalactan (11). These and other examples point towards an evolutionary  
83 significant role of mutations in intergenic regions in connection to bacterial  
84 pathogenesis, and justify a broader analysis of this type of mutations.

85 One reason for the paucity in genome-wide analysis of intergenic evolution is  
86 probably related to the inherent difficulties in inferring function directly from the  
87 sequence within intergenic regions and, consequently, to differentiate adaptive  
88 mutations with functional effects from neutral mutations that have been fixed by  
89 chance. Here, we harnessed the combination of parallel evolution and functional  
90 genomics to identify intergenic regions under selection in the genome of the  
91 opportunistic pathogen *Pseudomonas aeruginosa* during the process of host  
92 adaptation in multiple cystic fibrosis patients. Our study reveals that adaptive  
93 intergenic mutations represent an egregiously underappreciated aspect of host  
94 adaptation in *P. aeruginosa*, and that intergenic and coding region mutations  
95 contribute differently both qualitatively and quantitatively to this process.

96

## 97 **Results**

### 98 *Parallel evolution in intergenic regions in P. aeruginosa.*

99 To investigate the contribution of intergenic mutations to bacterial adaptation to the  
100 host environment, we considered data from seven studies (12-18) in which multiple  
101 clonal *P. aeruginosa* isolates have been sampled and sequenced during the course of  
102 infection in subjects with cystic fibrosis (CF). In CF infections, the host environments  
103 in individual subjects represent parallel selective conditions by which evolution is  
104 directed, and identification of parallel genetic evolution in bacteria from independent  
105 infections is strongly suggestive of positive selection at these loci (16).

106 Here, we focused our analysis exclusively on intergenic regions in which mutations  
107 were acquired during infection, and included only intergenic regions also present in  
108 the PAO1 reference genome. In total, we identified 3,489 mutations (2,024 SNPS and  
109 1,465 indels) in the intergenic regions of the 44 different *P. aeruginosa* clone types  
110 included in our data set (Table S1). Since the majority of regulatory elements in the  
111 bacterial genome range between 5-30 bp in length (19), we identified intergenic  
112 regions under positive selection by only considering mutations found in parallel in  
113 different clone types and distributed within a window of less than 30 bp (Materials  
114 and Methods). Applying these criteria, we found 63 intergenic regions with parallel  
115 genetic evolution (Figure 1).

116 Since certain *P. aeruginosa* clone types are transmissible and can form clinic-specific  
117 outbreaks among patients (16), we also analyzed if distinct intergenic mutations had  
118 accumulated in parallel among clonal isolates within each of the 44 clone type. We  
119 identified 41 intergenic regions in which three or more distinct mutations (less than  
120 30 bp apart) had accumulated in isolates of the same clone type (Figure 1).

121 Interestingly, 16 of these regions are also represented among the 63 regions  
122 identified in our analysis of parallel mutations between clone types providing further  
123 support for the importance of these mutations in adaptation of *P. aeruginosa* to the  
124 CF environment (Figure 1). In total, we identify 88 intergenic regions that evolved  
125 under the pressure of natural selection within the hosts. The connection between  
126 these ‘pathoadaptive’ regions and their flanking genes identify genetic systems with  
127 importance for pathogen adaptation and thus provide insight into the selective forces  
128 that operate on the pathogen.

129

130 *Intergenic mutations frequently target promoter sequences.*

131 We next analyzed the genomic distribution of the identified intergenic mutations.  
132 Non-translated intergenic regions are distributed across the genome in three  
133 possible orientations: 1) upstream of two genes, 2) downstream of two genes and 3)  
134 upstream of one gene and downstream of one gene, where the latter may include  
135 regions with no promoter and within an operon (Figure 2a). We found an over-  
136 representation of mutations upstream of two genes among the pathoadaptive  
137 regions (Fisher’s exact test,  $P = 0.010$ ,  $n = 88$ , Figure 2b). This bias towards selection  
138 of intergenic mutations upstream of genes suggest that the majority of intergenic  
139 mutations target potential *cis*-regulatory elements such as the core promoter,  
140 transcription factor binding sites, ribo-regulators, or translational elements, and  
141 consequently influence protein expression levels by affecting transcriptional or post-  
142 transcriptional processes.

143 To further explore this hypothesis, we analyzed the complete set of 88  
144 pathoadaptive regions for the presence of known regulatory elements (Materials

145 and Methods), and mapped the overlap between these putative regulatory sites and  
146 the identified adaptive mutations. While bacterial intergenic regions are home to a  
147 wide range of regulatory elements many of which are not well characterized, we  
148 nevertheless observed 28 regions (32%), in which the cluster of adaptive mutations  
149 was positioned within one or more putative regulatory elements. The majority of  
150 mutations within these 28 regions target the putative core promoter alone or in  
151 combination with other elements (Figure 2c), suggesting that intergenic mutations  
152 frequently target sequences important for transcriptional processes. In support of  
153 this, we observed that intergenic mutations were more frequently located upstream  
154 of known transcriptional start sites (TSS) (37 cases) than downstream (10 cases)  
155 (Table S6).

156

157 *Pathoadaptive intergenic mutations change transcriptional activity of genes involved*  
158 *in host interaction, metabolism, and antibiotic susceptibility.*

159 To further explore the potential relationship between intergenic mutations and  
160 transcription, we quantified the effects of a subset of intergenic mutations on  
161 transcription of downstream genes. To this end, we constructed transcriptional  
162 fusions of both wild-type and mutant intergenic alleles with the luciferase reporter  
163 (*luxCDABE*) genes and integrated single copies of the fusions at the neutral *attB* site  
164 (10) in the chromosome of *P. aeruginosa* PAO1. We measured the transcriptional  
165 activity of 25 different intergenic regions in which pathoadaptive mutations were  
166 located upstream of either one or two genes. This selection resulted in a total of 32  
167 transcriptional fusions, which represent 33% of all possible fusions within the  
168 complete set of 88 pathoadaptive regions. In addition, for one of the intergenic



169 regions (*ampR//ampC*), we tested two alleles each with different mutations (Table  
170 S7 and Figure S1).

171 Measurements of *lux* expression during exponential growth in Luria-Bertani (LB)  
172 medium and ABTGC minimal medium revealed significantly altered expressions in 16  
173 of 34 tested fusions in at least one of the two conditions (Student *t* test,  $P < 0.05$ ,  
174 Figure 3). Altered expression was in most cases moderate (<3-fold change) and  
175 ranged between -3.1 to 22.1 fold changes for the mutant allele compared to that of  
176 wild type (Figure 3). Interestingly, 10 of these 16 fusions exhibited altered  
177 expressions only in either LB or ABTGC minimal medium, but not in both conditions,  
178 which suggest that many adaptive intergenic mutations alter transcriptional levels  
179 while not interfering with conditional control mechanisms.

180 Overall, our results reveal that a substantial fraction of the intergenic mutations are  
181 associated with functional (transcriptional) effects despite the fact that we recorded  
182 these effects in the non-native PAO1 genetic background (*i.e.* with removal of  
183 potential epistatic effects from the additional mutations found in the clinical isolate)  
184 and in a narrow range of conditions, which most likely mean that we are not  
185 capturing the full spectrum of functional effects connected to the intergenic  
186 mutations.

187 Several of the 16 fusions with altered expression relate to genes that encode  
188 proteins with known functions in bacteria-host interactions, cellular metabolism, and  
189 antibiotic resistance. For example, *cerN* expresses a ceramidase involved in  
190 utilization of host produced sphingolipids (20), *exsC* expresses a protein involved in  
191 positive regulation of the type III secretion system (21), and PA4837 is the first gene  
192 in an operon (PA4837-34) involved in expression of a metalophore system essential

193 for survival in airway mucus secretions (22, 23). Other genes are known to play a role  
194 in pyrimidine and aromatic amino acid metabolism (*pyrC* and *hmgA*, respectively).  
195 Finally, two genes are linked to antibiotic resistance *rluC* (24) and *ampR* (25). Seven  
196 genes encode proteins of unknown functions and their role in relation to host  
197 adaptation remains unclear.

198 Interestingly, expression changes were observed in both directions (seven mutant  
199 alleles resulted in increased expression, and nine mutant alleles resulted in  
200 decreased expression) (Figure 3), suggesting that pathoadaptive intergenic  
201 mutations may equally well either create or destroy regulatory interactions.

202

### 203 *Mutations upstream of ampR and ampC enhance resistance to several antibiotics*

204 Next, we explored the direct effects of intergenic mutations on the physiology of the  
205 pathogen. As resistance towards antibiotics is a common phenotype that emerges  
206 during CF infections, we selected the mutations found in the two alleles of the  
207 *ampR//ampC* intergenic region for further study. Mutations in this intergenic region  
208 resulted in enhanced expression of the global antibiotic resistance regulator AmpR,  
209 but had no direct effect on expression of the AmpC  $\beta$ -lactamase (Figure 3). We  
210 introduced these mutations in the genome of *P. aeruginosa* PAO1 through allelic  
211 replacement (Materials and Methods). Since a SNP mutation (G7A) was present at  
212 the start of *ampC* gene in one of the alleles, we also made an allelic replacement of  
213 this mutation alone in the PAO1 genome to separate the effects caused by the  
214 intergenic mutations (Figure S1). For each strain and their isogenic wild type, we  
215 measured the Minimal Inhibitory Concentration (MIC) of various  $\beta$ -lactam antibiotics  
216 such as imipenem, ceftazidime and ampicillin from carbapenem, cephalosporin, and

217 penicillin classes of  $\beta$ -lactams respectively. For both intergenic alleles, we observed a  
218 small but significant increase in the MIC of imipenem and ampicillin (Student *t* test, *P*  
219  $< 0.01$ , Figure 4), but not ceftazidime. AmpR regulates  $\beta$ -lactam resistance both  
220 through direct activation of AmpC expression as well as via an AmpC-independent  
221 manner (25). Irrespective of the mechanism, our results show that acquisition of  
222 intergenic mutations between *ampR* and *ampC* is directly linked to a host-relevant  
223 phenotypic alteration (*i.e.* reduced  $\beta$ -lactam susceptibility).

224

225 *Intergenic evolution targets essential genes and contributes more to host adaptation*  
226 *than intragenic evolution*

227 Finally, we compared the relative contribution of coding and intergenic mutations to  
228 pathogen adaptation. We focused on the large fraction of isolates ( $n=474$ ) included  
229 in this study, in which 52 coding regions were found to be under positive selection  
230 during host adaptation (17). In these isolates, we identified 35 pathoadaptive  
231 intergenic regions (Materials and Methods, Table S8). Although coding region  
232 mutations are numerically dominant over intergenic mutations, normalization to the  
233 mutational targets available for intergenic and coding region mutations (89.8% of  
234 the *P. aeruginosa* genome contains coding regions), reveal that intergenic regions  
235 are 3.7 times more likely to be selected than coding regions and thus appear to play  
236 a quantitatively more prominent role in host adaptation (Figure 5a).

237 We also analyzed qualitative differences between coding and intergenic mutations  
238 by determining the presence of essential genes among the pathoadaptive coding and  
239 intergenic regions. By cross-referencing the 35 pathoadaptive intergenic regions to  
240 the list of 445 genes previously shown to be essential for survival of *P. aeruginosa*

241 PAO1 in CF sputum environment (26), we found that 7 of the 38 genes located  
242 immediately downstream of the 35 pathoadaptive intergenic regions are essential  
243 (Table S8). Two of these genes (*pyrC* and PA5492) showed altered expression as a  
244 consequence of pathoadaptive mutations in their intergenic region, demonstrating  
245 that such mutations can indeed modulate expression of essential genes (Figure 3).  
246 Importantly, the association between pathoadaptive intergenic regions and essential  
247 genes at a level of 18% represents a significant overrepresentation from the normal  
248 prevalence of CF sputum essential genes in the *P. aeruginosa* PAO1 genome (Figure  
249 5b, Fisher's exact test,  $P = 0.029$ ). In contrast, there were no CF sputum essential  
250 genes within 52 pathoadaptive coding regions demonstrating a significant  
251 underrepresentation of these genes within adaptive coding regions (Figure 5b,  
252 Fisher's exact test,  $P = 0.033$ ).  
253

254 **Discussion**

255 In this study, we present evidence that intergenic mutations constitute an important  
256 part of the genetic basis for host adaptation in *P. aeruginosa*. Generally, the  
257 contribution of intergenic regions to evolution of host-adapted variants has received  
258 little attention. However, since the development of predictive models of pathogen  
259 evolution and identification of new therapeutic targets (27, 28) rely on  
260 understanding the evolutionary response of pathogens to the host environment,  
261 identification of the full range of adaptive mutations in both coding and non-coding  
262 regions is important. Here, our genome-wide identification of intergenic regions  
263 under selection within the host was made possible by combining analysis of parallel  
264 evolution across a large number of infected individuals with functional genomics.  
265 This approach may be useful for analysis of intergenic regions in connection to host  
266 adaptation in other pathogens or niche adaptation in general.

267

268 Our identification of pathoadaptive intergenic regions provide insight into the  
269 cellular functions targeted by intergenic mutations (Figure 1) and thus point to the  
270 selective pressures that confronts the pathogen within its CF hosts. For example,  
271 adaptive mutations were found to alter expression of genes such as *cerN* (involved in  
272 sphingolipid utilization) (20), *phuR-phuSTUVW* (involved in iron acquisition) (10), and  
273 PA4837-34 (involved in zink acquisition) (22), which strongly indicate that metabolic  
274 adaptation to better exploit the available nutrients in the host is an important  
275 evolutionary driver. Similarly, we observed that mechanisms to tolerate antibiotics  
276 and other inhibitors in the host are also frequent targets of intergenic molecular  
277 evolution. Similar functional categories have been found in studies focusing on

278 pathoadaptive mutations within coding regions (14, 16, 17), suggesting that key  
279 selective pressures such as nutrient availability and antibiotic stress can be mitigated  
280 both by intergenic and coding region evolution in *P. aeruginosa*.

281

282 At the functional level, we show that intergenic evolution predominantly targets  
283 transcriptional processes to alter the transcriptional activity of downstream genes.  
284 However, we also found evidence of parallel evolution in two intergenic small RNAs,  
285 four transcriptional terminators, and several cases of mutations located downstream  
286 of transcriptional start sites (Table S5 and Table S6), which suggest that adaptive  
287 mutations may also target elements that control protein expression at the post-  
288 transcriptional level. Importantly, we have shown here and in a previous study that  
289 intergenic mutations can be directly responsible for the evolution of important  
290 pathogenic traits such as reduced sensitivity to antibiotics (Figure 4) and increased  
291 iron uptake (10). Further studies, in particular of pathoadaptive regions upstream of  
292 genes with unknown functions, will most likely uncover new mechanisms central to  
293 CF host colonization and pathogenesis, and assist in identifying the full complement  
294 of stressors present in the host most of which are currently unknown.

295

296 Our study also reveals important qualitative differences between the intergenic and  
297 coding region mutations. A generally accepted model is that intergenic mutations  
298 would typically confer local and subtle regulatory effects primarily on the immediate  
299 downstream genes, whereas mutations in coding regions - with their potential to  
300 inactivate entire pathways - would be more likely to cause systemic changes of the  
301 physiology of the cell (8, 29). One prediction from this model is that intergenic

302 mutations are associated with less antagonistic effects relative to coding region  
303 mutations. While this prediction is difficult to test, our observation of enrichment of  
304 essential genes for which intergenic evolution occurred is a clear illustration of this  
305 point (Figure 5). The finding that intergenic mutations can bypass the deleterious  
306 effects of coding region mutations thus allowing essential genes to become targets  
307 for evolutionary changes reveals an important aspect of the role of intergenic  
308 mutations, and a key functional difference between intergenic and coding region  
309 mutations.

310

311 From a quantitative perspective, we find that intergenic mutations are more likely to  
312 be selected than coding region mutations during CF host adaptation in *P. aeruginosa*  
313 (Figure 5). We hypothesize that the relative contribution of coding and intergenic  
314 mutations is variable and depends on a set of identifiable factors of either  
315 environmental nature (e.g. niche complexity) or intrinsic to the bacterial pathogen  
316 (e.g. genome size, and the number of transcriptional regulatory systems and  
317 essential genes encoded in the genome). Although the precise factors that influence  
318 the relative contribution of the two types of mutations may be difficult to  
319 disentangle, we speculate that in the case of *P. aeruginosa* CF infections, a major  
320 contributing factor is the composition of the adaptive environment in the host. The  
321 CF host niche is characterized by a complex combination of multiple stressors that  
322 must be mitigated for successful bacterial colonization (30). In such environments,  
323 mutations in intergenic regions that tune expression levels while maintaining  
324 responsiveness to environmental and host derived cues may result in less pleiotropic  
325 effects than mutations that change protein structure or function (29). Further

326 studies of *P. aeruginosa* adaptation in other infections and host environments such  
327 as chronic wounds and ulcerative keratitis (31) are required to identify factors that  
328 may influence the relative contribution of intergenic and coding region evolution.

329

330 Our documentation of the evolutionary significance of intergenic mutations was  
331 obtained in the particular genetic and ecological context of *P. aeruginosa* adaptation  
332 to the cystic fibrosis airway niche. Nevertheless, our systematic study provides  
333 insight into the contribution and functionality of intergenic versus intragenic  
334 mutations, which is of broader relevance in connection to bacterial evolution in  
335 natural environments. This is supported by recent observations indicating that other  
336 contexts may also promote intergenic evolution. For example, our results resonates  
337 well with results showing that adaptive intergenic mutations contribute to  
338 innovation of novel metabolic functions in laboratory-evolving *Escherichia coli* (32),  
339 evidence of a signal of positive selection in *Mycobacteria tuberculosis* intergenic  
340 regions (6), and the suggestion that intergenic evolution may mitigate detrimental  
341 fitness effects associated with acquisition of novel genetic material (33). We suggest  
342 that adaptive mutations in intergenic regions represent an important but  
343 underappreciated aspect of bacterial evolution not only in connection to host  
344 colonization but also niche adaptation in other natural environments.

345

346



347 **Materials and Methods**

348 *Bacterial strain and growth conditions*

349 Luria-Bertani (LB) and ABT minimal medium supplemented with 1% glucose and 1%  
350 casamino acids (ABTGC) (10) were routinely used for growth of *Escherichia coli* and  
351 *P. aeruginosa* strains. *E. coli* CC118  $\lambda$ pir was used for maintenance of recombinant  
352 plasmids supplemented with 8  $\mu$ g/ml of tetracycline. *P. aeruginosa* PAO1 strain was  
353 used for phenotypic investigation of intergenic mutations. For final marker selection  
354 of *P. aeruginosa*, 50  $\mu$ g/ml of tetracycline was used.

355

356 *Identification of pathoadaptive intergenic regions*

357 The dataset used for analysis of intergenic evolution is described in SI Materials and  
358 Methods. Presence of independent clonal lineages of *P. aeruginosa* were verified by  
359 detection of MLST allele profiles as described in SI Materials and Methods.  
360 Pathoadaptive intergenic regions selected across 44 clones were defined as regions  
361 containing multiple mutations from isolates of independent clones within a narrow  
362 region of less than 30 bp. Similarly, intergenic regions containing multiple distinct  
363 mutations from isolates of the same clone within a narrow 30 bp window were also  
364 defined as pathoadaptive within that clone. Presences of mutations within narrow  
365 windows of pathoadaptive regions were more enriched than what is expected by  
366 chance within the dataset. Detailed description is available at SI Materials and  
367 Methods. Identification of putative intergenic elements within pathoadaptive  
368 intergenic regions is described in SI Material and Methods.

369

370 *Genetic techniques*

371 Genetic engineering of reporter fusion and allelic replacement plasmids are  
372 described in SI Materials and Method. Presence of mutated alleles within reporter  
373 fusion and allelic replacement constructs were verified by Sanger sequencing.  
374 Reporter fusion plasmid were electroporated into *P. aeruginosa* PAO1 as previously  
375 described (34). Constructs with allelic replacements were introduced into *P.*  
376 *aeruginosa* by triparental mating using the helper strain *E. coli* HB101/pRK600 (35).  
377 The presence of mutated alleles in tetracycline sensitive sucrose resistant colonies  
378 isolates were verified by PCR and Sanger sequencing.

379

380 *Phenotype assays*

381 Phenotypic expression of reporter fusion strains were investigated as described in SI  
382 Materials and Methods. Continuous measurements of growth (OD<sub>600</sub>) and  
383 luminescence were recorded by Cytation 5 multimode reader (BioTek) at 200 rpm  
384 shaking condition and 37 C temperature. Lux expression normalized by cell density  
385 for all strains were recorded and compared against reporter fusions containing wild  
386 type alleles. Measurements were repeated three times for each reporter fusion  
387 strain. Determination of MIC values for ceftazidime, imipenem and ampicillin are  
388 described in SI Materials and Methods. MIC values were either measured by  
389 standard microdilution method in Mueller-Hinton (MH) broth or using E-test on MH  
390 agar plates. Measurements were repeated five times for each strain. Statistical  
391 differences between means of replicates for reporter fusion and MIC resistance  
392 assays were calculated by two-tailed student *t* test.

393

394 **Acknowledgements**

395 We thank Lea M. Sommer and Anders Norman for technical advices in bioinformatics  
396 approaches, Esben V. Nisted for help in design of primers, Nicoline Uglebjerg and  
397 Caroline A. S. Lauridsen for assistance in identification of putative intergenic  
398 elements. We also thank Grith Hermansen, Geoff Winsor, Ed Feil, Dominique  
399 Schneider, and Thomas Hindré for valuable discussions. This work was supported by  
400 the Danish Council for Independent Research (6108-00300A) and the Villum  
401 Foundation (VKR023113).

402

403 **Author contributions**

404 S.M.H.K and L.J. conceived study and designed research. S.M.H.K. performed  
405 research. S.M.H.K and L.J. analyzed data and wrote the manuscript.

406

407 **References**

- 408 1. Didelot X, Walker AS, Peto TE, Crook DW, & Wilson DJ (2016) Within-host  
409 evolution of bacterial pathogens. *Nat Rev Microbiol* 14(3):150-162.
- 410 2. Hoffman LR, *et al.* (2009) *Pseudomonas aeruginosa* lasR mutants are  
411 associated with cystic fibrosis lung disease progression. *J Cyst Fibros* 8(1):66-  
412 70.
- 413 3. Das S, *et al.* (2016) Natural mutations in a *Staphylococcus aureus* virulence  
414 regulator attenuate cytotoxicity but permit bacteremia and abscess  
415 formation. *Proc Natl Acad Sci U S A* 113(22):E3101-3110.
- 416 4. Honsa ES, *et al.* (2017) RelA Mutant *Enterococcus faecium* with  
417 Multiantibiotic Tolerance Arising in an Immunocompromised Host. *MBio* 8(1).
- 418 5. Molina N & van Nimwegen E (2008) Universal patterns of purifying selection  
419 at noncoding positions in bacteria. *Genome Res* 18(1):148-160.
- 420 6. Thorpe HA, Bayliss SC, Hurst LD, & Feil EJ (2017) Comparative Analyses of  
421 Selection Operating on Nontranslated Intergenic Regions of Diverse Bacterial  
422 Species. *Genetics* 206(1):363-376.
- 423 7. Kim D, *et al.* (2012) Comparative analysis of regulatory elements between  
424 *Escherichia coli* and *Klebsiella pneumoniae* by genome-wide transcription  
425 start site profiling. *PLoS Genet* 8(8):e1002867.
- 426 8. Wray GA (2007) The evolutionary significance of cis-regulatory mutations.  
427 *Nat Rev Genet* 8(3):206-216.
- 428 9. Osborne SE, *et al.* (2009) Pathogenic adaptation of intracellular bacteria by  
429 rewiring a cis-regulatory input function. *Proc Natl Acad Sci U S A*  
430 106(10):3982-3987.

- 431 10. Marvig RL, *et al.* (2014) Within-host evolution of *Pseudomonas aeruginosa*  
432 reveals adaptation toward iron acquisition from hemoglobin. *MBio*  
433 5(3):e00966-00914.
- 434 11. Cui Z, *et al.* (2014) Mutations in the *embC-embA* intergenic region contribute  
435 to *Mycobacterium tuberculosis* resistance to ethambutol. *Antimicrob Agents*  
436 *Chemother* 58(11):6837-6843.
- 437 12. Chung JC, *et al.* (2012) Genomic variation among contemporary  
438 *Pseudomonas aeruginosa* isolates from chronically infected cystic fibrosis  
439 patients. *J Bacteriol* 194(18):4857-4866.
- 440 13. Cramer N, *et al.* (2011) Microevolution of the major common *Pseudomonas*  
441 *aeruginosa* clones C and PA14 in cystic fibrosis lungs. *Environ Microbiol*  
442 13(7):1690-1704.
- 443 14. Jeukens J, *et al.* (2014) Comparative genomics of isolates of a *Pseudomonas*  
444 *aeruginosa* epidemic strain associated with chronic lung infections of cystic  
445 fibrosis patients. *PLoS One* 9(2):e87611.
- 446 15. Marvig RL, *et al.* (2013) Draft Genome Sequences of *Pseudomonas*  
447 *aeruginosa* B3 Strains Isolated from a Cystic Fibrosis Patient Undergoing  
448 Antibiotic Chemotherapy. *Genome Announc* 1(5).
- 449 16. Marvig RL, Johansen HK, Molin S, & Jelsbak L (2013) Genome analysis of a  
450 transmissible lineage of *pseudomonas aeruginosa* reveals pathoadaptive  
451 mutations and distinct evolutionary paths of hypermutators. *PLoS Genet*  
452 9(9):e1003741.

- 453 17. Marvig RL, Sommer LM, Molin S, & Johansen HK (2015) Convergent evolution  
454 and adaptation of *Pseudomonas aeruginosa* within patients with cystic  
455 fibrosis. *Nat Genet* 47(1):57-64.
- 456 18. Smith EE, *et al.* (2006) Genetic adaptation by *Pseudomonas aeruginosa* to the  
457 airways of cystic fibrosis patients. *Proc Natl Acad Sci U S A* 103(22):8487-  
458 8492.
- 459 19. Stewart AJ, Hannenhalli S, & Plotkin JB (2012) Why transcription factor  
460 binding sites are ten nucleotides long. *Genetics* 192(3):973-985.
- 461 20. LaBauve AE & Wargo MJ (2014) Detection of host-derived sphingosine by  
462 *Pseudomonas aeruginosa* is important for survival in the murine lung. *PLoS*  
463 *Pathog* 10(1):e1003889.
- 464 21. Dasgupta N, Lykken GL, Wolfgang MC, & Yahr TL (2004) A novel anti-anti-  
465 activator mechanism regulates expression of the *Pseudomonas aeruginosa*  
466 type III secretion system. *Mol Microbiol* 53(1):297-308.
- 467 22. Mastropasqua MC, *et al.* (2017) Growth of *Pseudomonas aeruginosa* in zinc  
468 poor environments is promoted by a nicotianamine-related metallophore.  
469 *Mol Microbiol* 106(4):543-561.
- 470 23. Gi M, *et al.* (2015) A novel siderophore system is essential for the growth of  
471 *Pseudomonas aeruginosa* in airway mucus. *Sci Rep* 5:14644.
- 472 24. Toh SM & Mankin AS (2008) An indigenous posttranscriptional modification  
473 in the ribosomal peptidyl transferase center confers resistance to an array of  
474 protein synthesis inhibitors. *J Mol Biol* 380(4):593-597.
- 475 25. Kumari H, Balasubramanian D, Zincke D, & Mathee K (2014) Role of  
476 *Pseudomonas aeruginosa* AmpR on beta-lactam and non-beta-lactam

- 477 transient cross-resistance upon pre-exposure to subinhibitory concentrations  
478 of antibiotics. *J Med Microbiol* 63(Pt 4):544-555.
- 479 26. Turner KH, Wessel AK, Palmer GC, Murray JL, & Whiteley M (2015) Essential  
480 genome of *Pseudomonas aeruginosa* in cystic fibrosis sputum. *Proc Natl Acad*  
481 *Sci U S A* 112(13):4110-4115.
- 482 27. Yen P & Papin JA (2017) History of antibiotic adaptation influences microbial  
483 evolutionary dynamics during subsequent treatment. *PLoS Biol*  
484 15(8):e2001586.
- 485 28. Smith PA & Romesberg FE (2007) Combating bacteria and drug resistance by  
486 inhibiting mechanisms of persistence and adaptation. *Nat Chem Biol*  
487 3(9):549-556.
- 488 29. Coombes BK (2013) Regulatory evolution at the host-pathogen interface. *Can*  
489 *J Microbiol* 59(6):365-367.
- 490 30. Folkesson A, *et al.* (2012) Adaptation of *Pseudomonas aeruginosa* to the  
491 cystic fibrosis airway: an evolutionary perspective. *Nat Rev Microbiol*  
492 10(12):841-851.
- 493 31. Winstanley C, *et al.* (2005) Genotypic and phenotypic characteristics of  
494 *Pseudomonas aeruginosa* isolates associated with ulcerative keratitis. *J Med*  
495 *Microbiol* 54(Pt 6):519-526.
- 496 32. Blank D, Wolf L, Ackermann M, & Silander OK (2014) The predictability of  
497 molecular evolution during functional innovation. *Proc Natl Acad Sci U S A*  
498 111(8):3044-3049.

- 499 33. McNally A, *et al.* (2016) Combined Analysis of Variation in Core, Accessory  
500 and Regulatory Genome Regions Provides a Super-Resolution View into the  
501 Evolution of Bacterial Populations. *PLoS Genet* 12(9):e1006280.
- 502 34. Choi KH & Schweizer HP (2006) mini-Tn7 insertion in bacteria with single  
503 attTn7 sites: example *Pseudomonas aeruginosa*. *Nat Protoc* 1(1):153-161.
- 504 35. Kessler B, de Lorenzo V, & Timmis KN (1992) A general system to integrate  
505 lacZ fusions into the chromosomes of gram-negative eubacteria: regulation of  
506 the Pm promoter of the TOL plasmid studied with all controlling elements in  
507 monocopy. *Mol Gen Genet* 233(1-2):293-301.
- 508



509 **Figure Legends**

510 **Figure 1:** Pathoadaptive intergenic regions. Regions targeted by mutations involved  
511 in host adaptation through parallel evolution across or within clone types. The black  
512 squares in the matrix show the intergenic region with parallel mutations in isolates  
513 of the respective clone type. The red squares in the matrix show the intergenic  
514 region with parallel mutations within isolates of a clone type alone. Squares with  
515 striped red color indicate regions in which mutations has been selected both within  
516 isolates of that clone type and across other clone types.

517

518 **Figure 2:** Orientation and regulatory elements in intergenic regions. a) Overview of  
519 the three different orientations of intergenic regions and the possible location of  
520 potential elements within each type. b) Distribution of different orientations of  
521 intergenic regions (I-III) within PAO1 genome and the pathoadaptive intergenic  
522 regions. Two-tailed Fisher's exact test is performed to analyze over-representation  
523 or under-representation of certain orientations within pathoadaptive intergenic  
524 regions (n = 88). c) Pie chart demonstrating the distribution of putative intergenic  
525 elements targeted by pathoadaptive intergenic mutations among regions where the  
526 mutation cluster was within any known element (n = 28).

527

528 **Figure 3:** Intergenic mutations with functional effects on transcription. Expression of  
529 *lux* from transcriptional fusions with mutated and wildtype alleles were measured at  
530  $OD_{600} = 0.15$  and normalized by cell density. Transcriptional fusions were examined  
531 in Luria-Bertani (LB) and ABTGC minimal media. Mean luminescence was calculated  
532 for three biological replicates and the relative fold change of mutant versus wildtype

533 allele calculated. Statistical analysis of the difference between two means was  
534 performed by a two-tailed Student *t* test and the asterisk denotes  $P < 0.05$ .

535

536 **Figure 4:** Mutations in the intergenic region between *ampC* and *ampR* cause an  
537 increased tolerance towards imipenem and ampicillin. The values for Minimal  
538 Inhibitory Concentration (MIC) and the constructed mutations in each strain of PAO1  
539 are shown. Mutation G-98A upstream *ampC* derives from isolate DK2-CF173-1995.  
540 Three mutations G-38A, C-66T and G-78A upstream of *ampC* originate from isolate  
541 DK1-P43-M2-2002. A SNP mutation at the start of *ampC* (G7A) in DK1-P43-M2-2002  
542 was also constructed in laboratory strain PAO1 to isolate the effect of this mutation  
543 and the effect of intergenic mutations from DK1-P43-M2-2002. Error bars indicate  
544 standard deviation from three different biological replicates. Double asterisk indicate  
545 significant difference between mean MIC of the strains (Two-tailed Student *t* test,  $P$   
546  $< 0.01$ ).

547

548 **Figure 5:** Contribution and function of coding and intergenic mutations. 52 coding  
549 regions are under positive selection in a selected subset of our dataset comprising of  
550 474 long-term CF adapted isolates of *P. aeruginosa* (17). In the same isolates, we  
551 identify 35 intergenic regions under positive selection for adaptive mutations (Table  
552 S8). a) To calculate the relative presence of adaptive mutations within coding or  
553 intergenic regions, we divided the number of pathoadaptive features by mutational  
554 targets available within each category (89.8% coding and 10.2% intergenic). Final  
555 relative frequency for selection of each pathoadaptive feature is shown in the  
556 barplot. b) 445 genes are essential for survival of *P. aeruginosa* in CF sputum

557 environment (26). The percentage of these essential genes within 52 pathoadaptive  
558 genes and 38 genes downstream of 35 pathoadaptive intergenic regions is  
559 demonstrated. Asterisk denotes  $P < 0.05$  from two-tailed Fisher's exact test. Red  
560 dashed line indicates the percentage of CF essential genes in PAO1.  
561

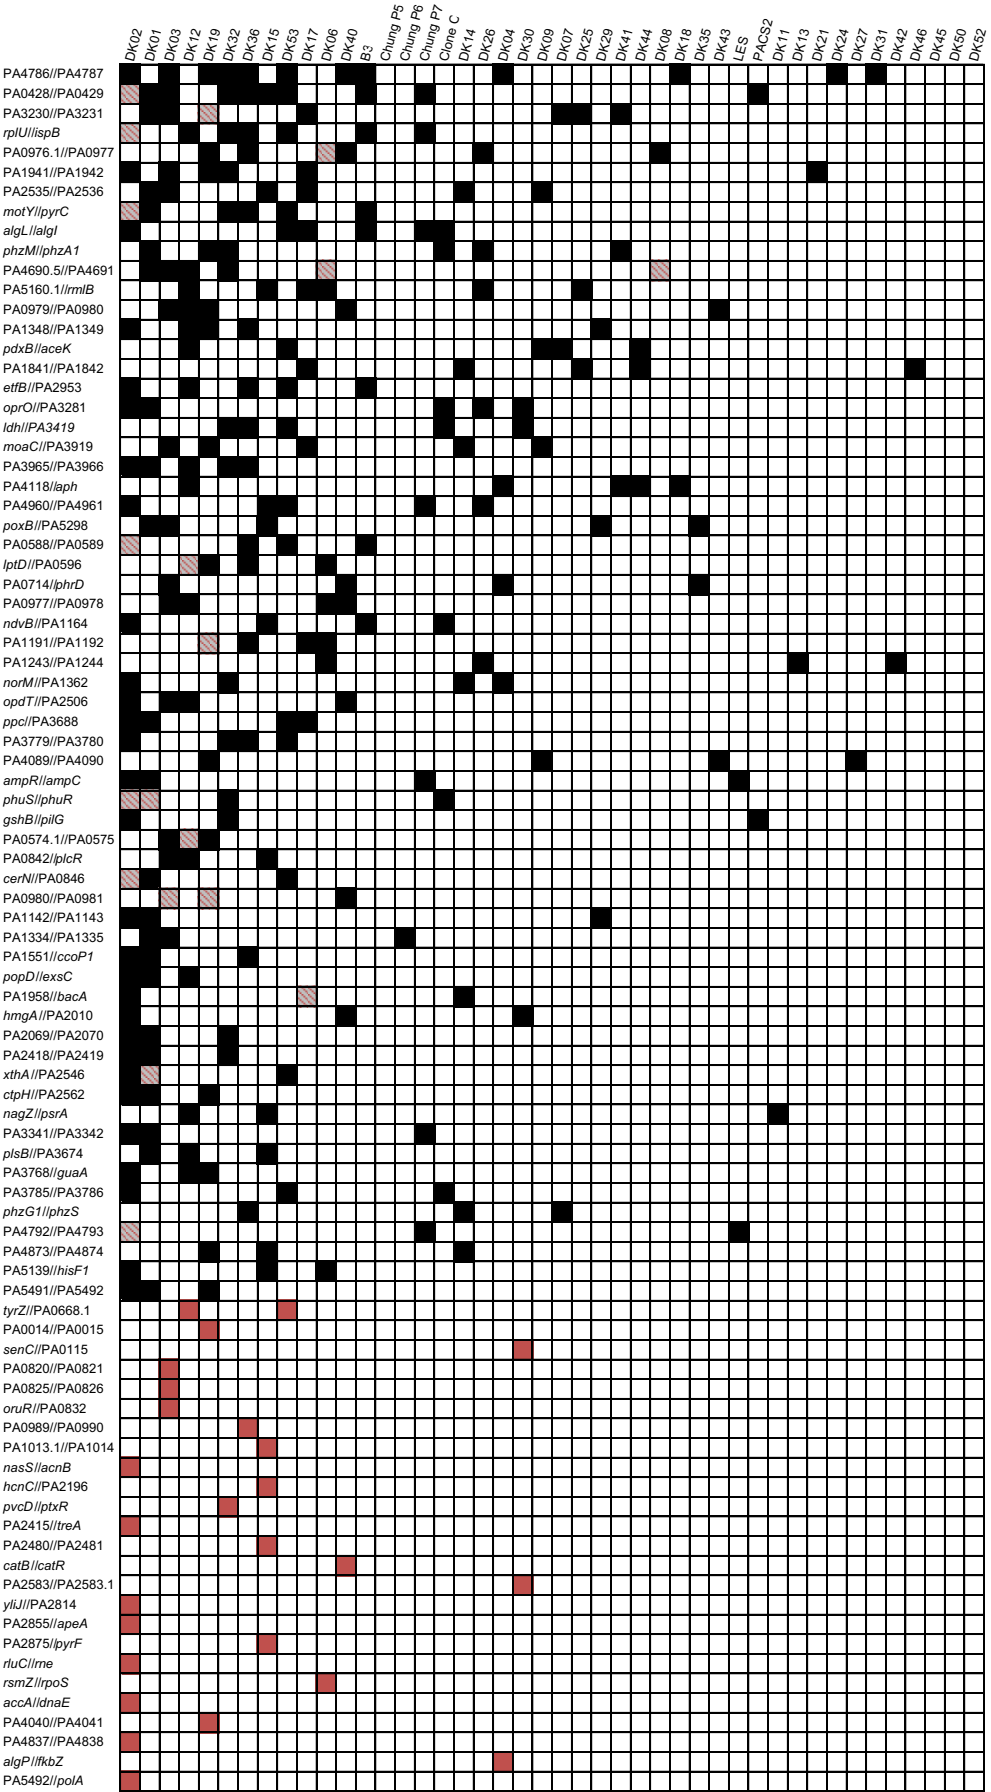

**a**

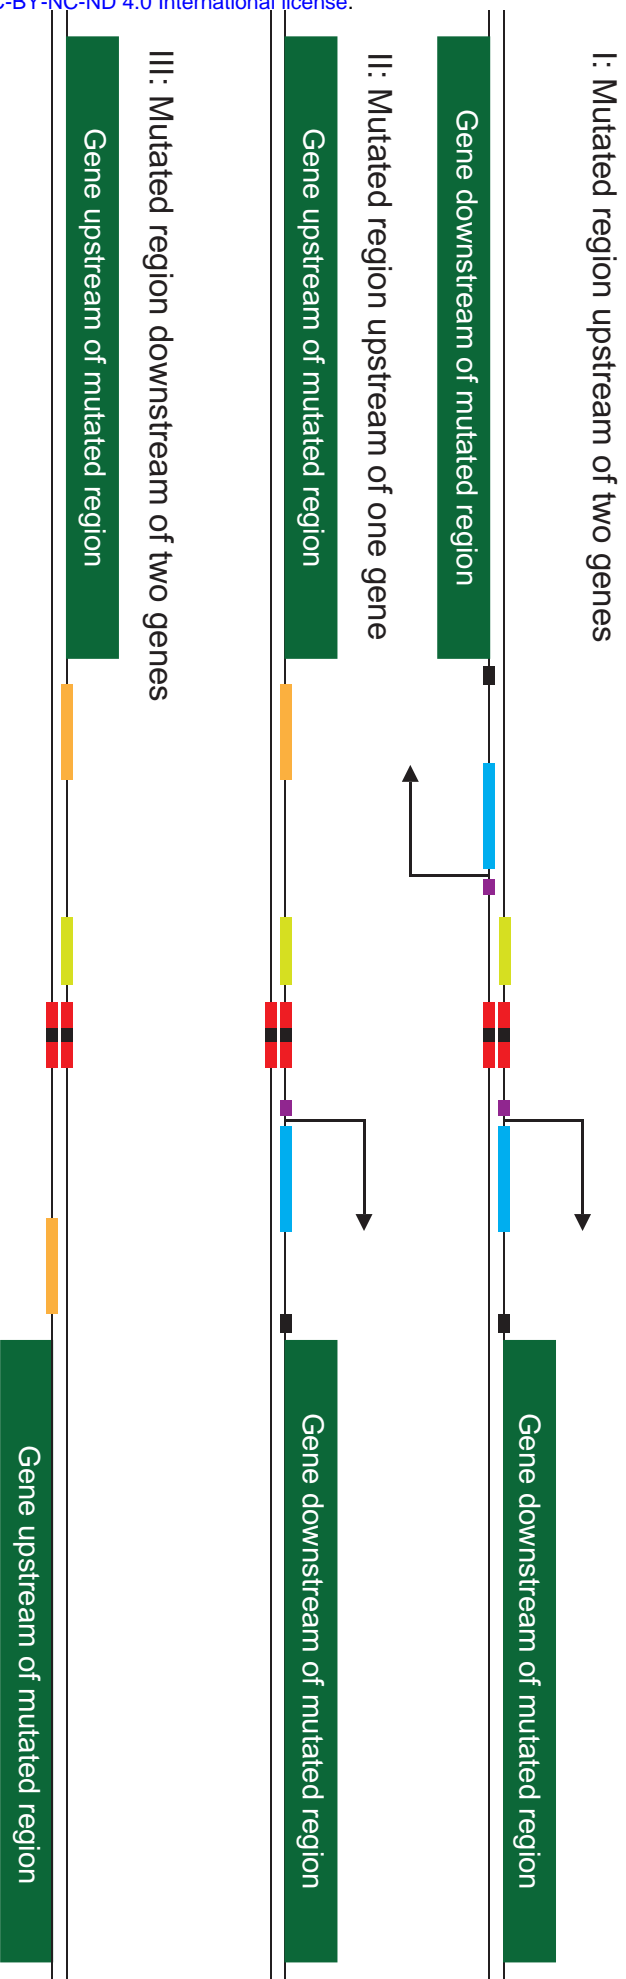

**b**

|     | Present | % of total | PAO1 genome | % of total | Enrichment | P-value |
|-----|---------|------------|-------------|------------|------------|---------|
| I   | 25      | 28         | 812         | 17         | 1,64       | 0,010   |
| II  | 15      | 17         | 755         | 16         | 1,06       | 0,771   |
| III | 48      | 55         | 3115        | 67         | 0,82       | 0,022   |

**c**

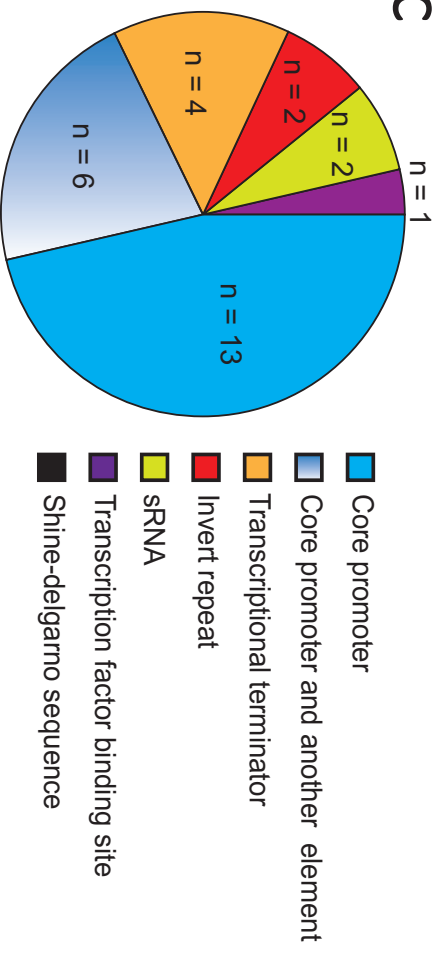

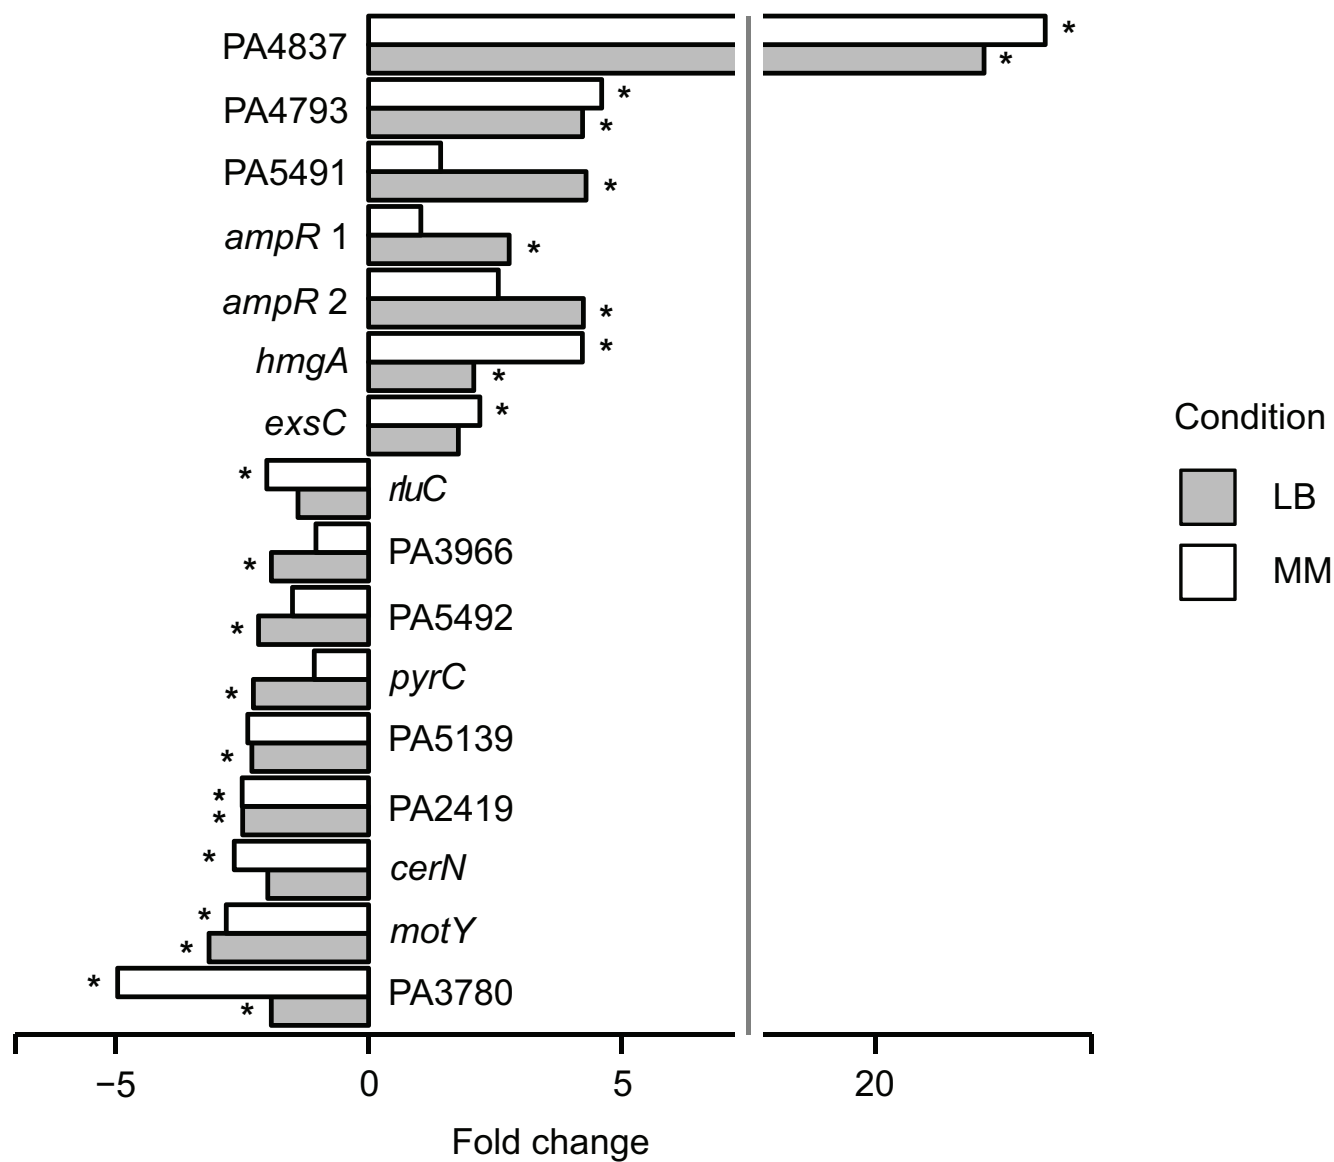

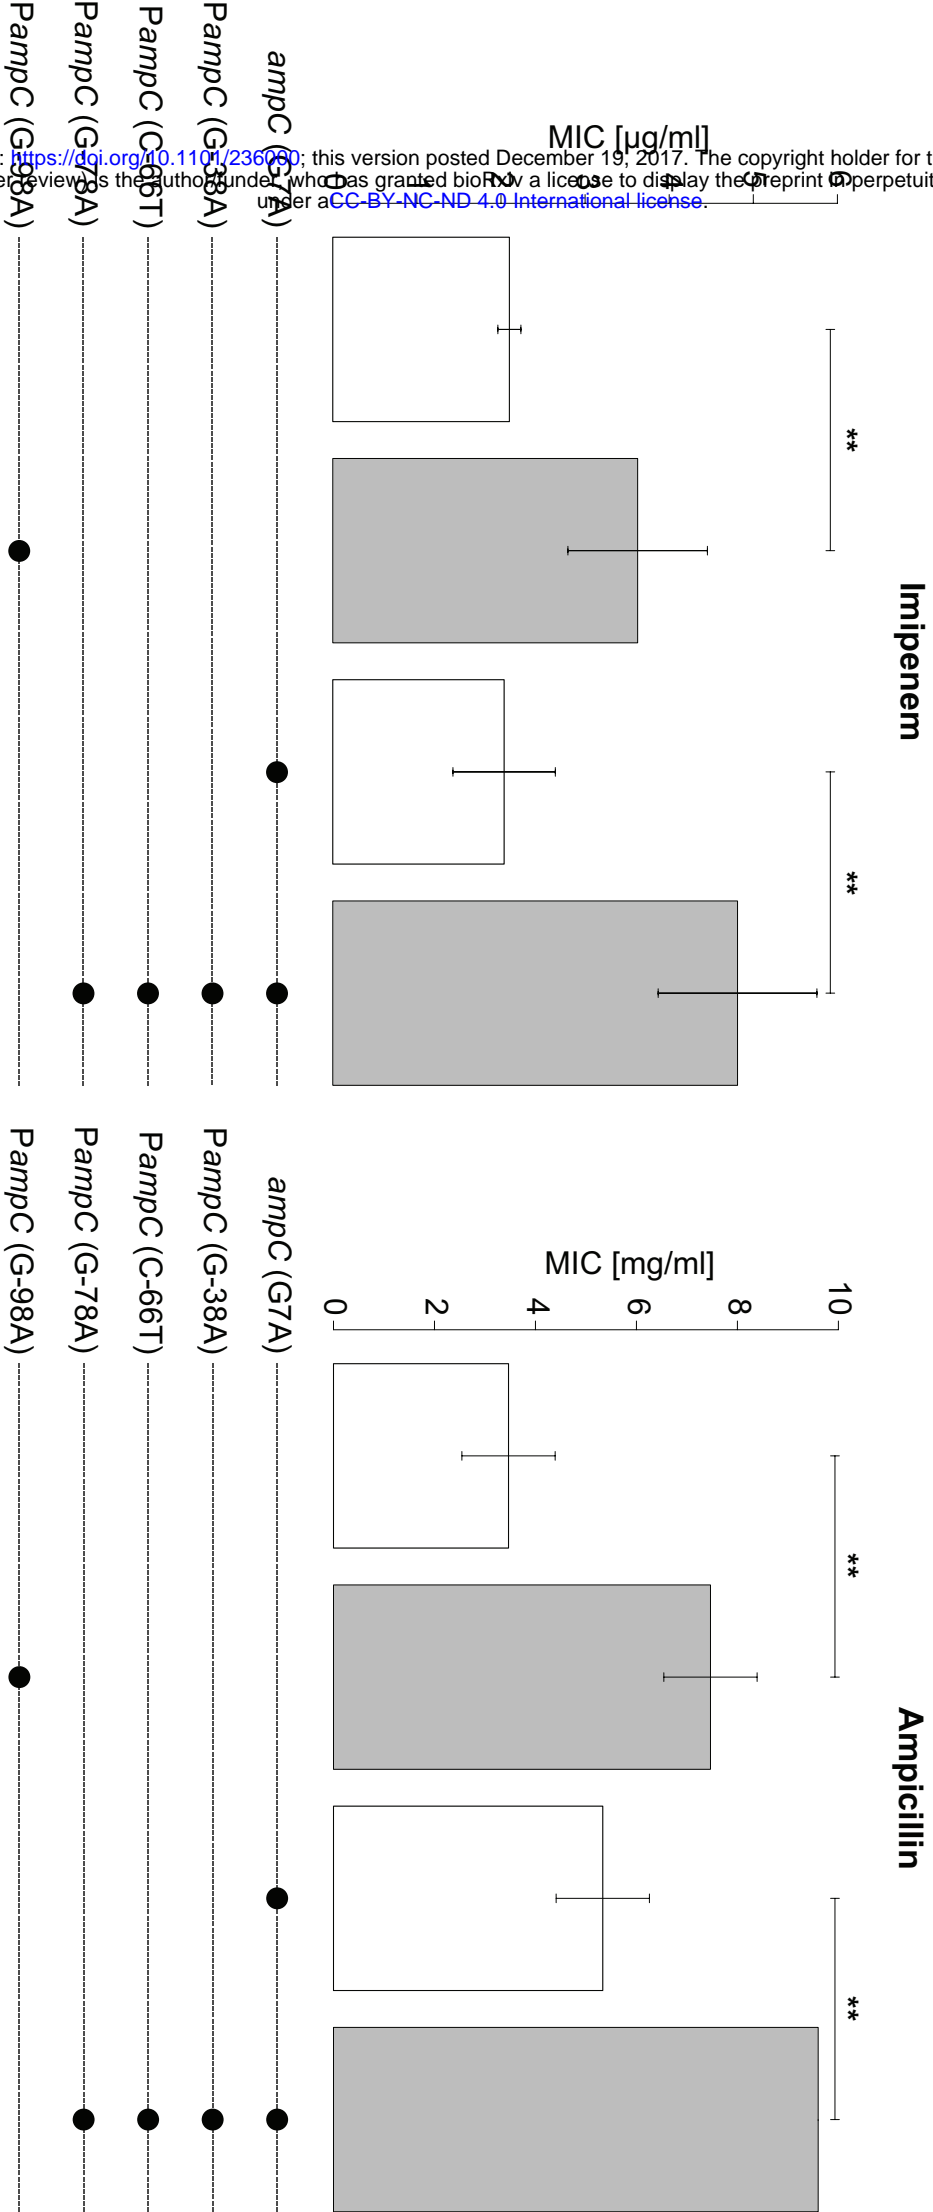

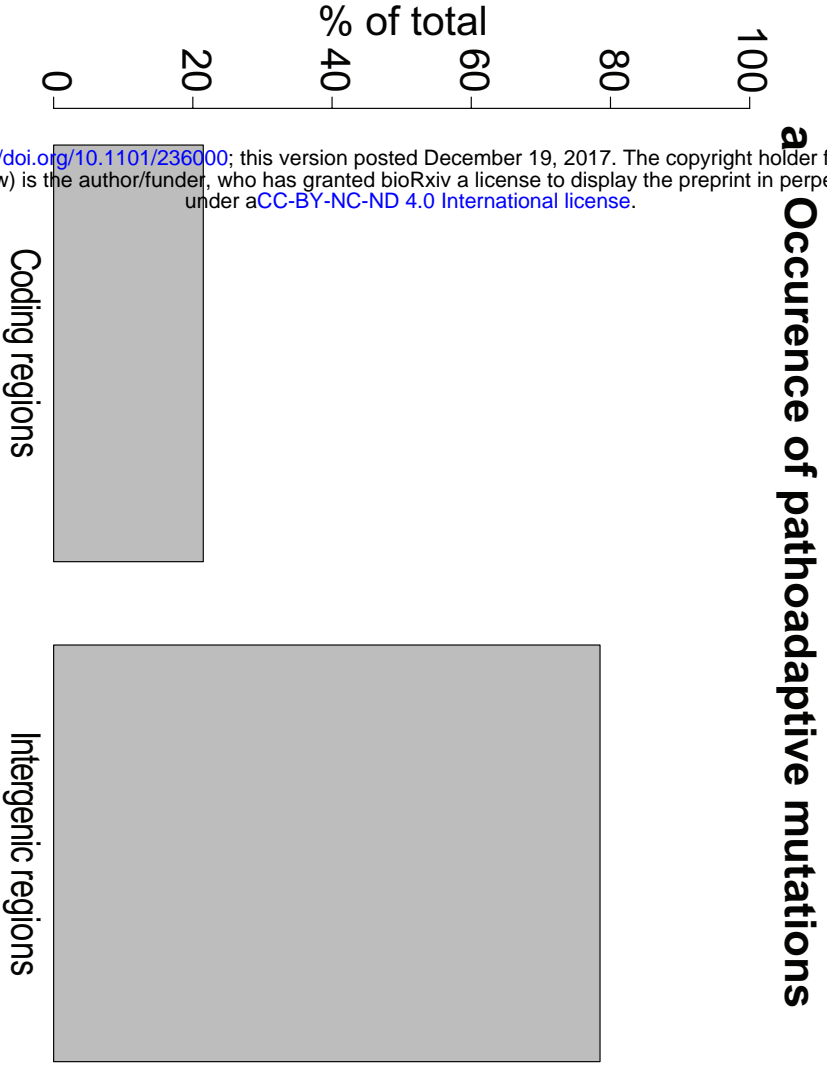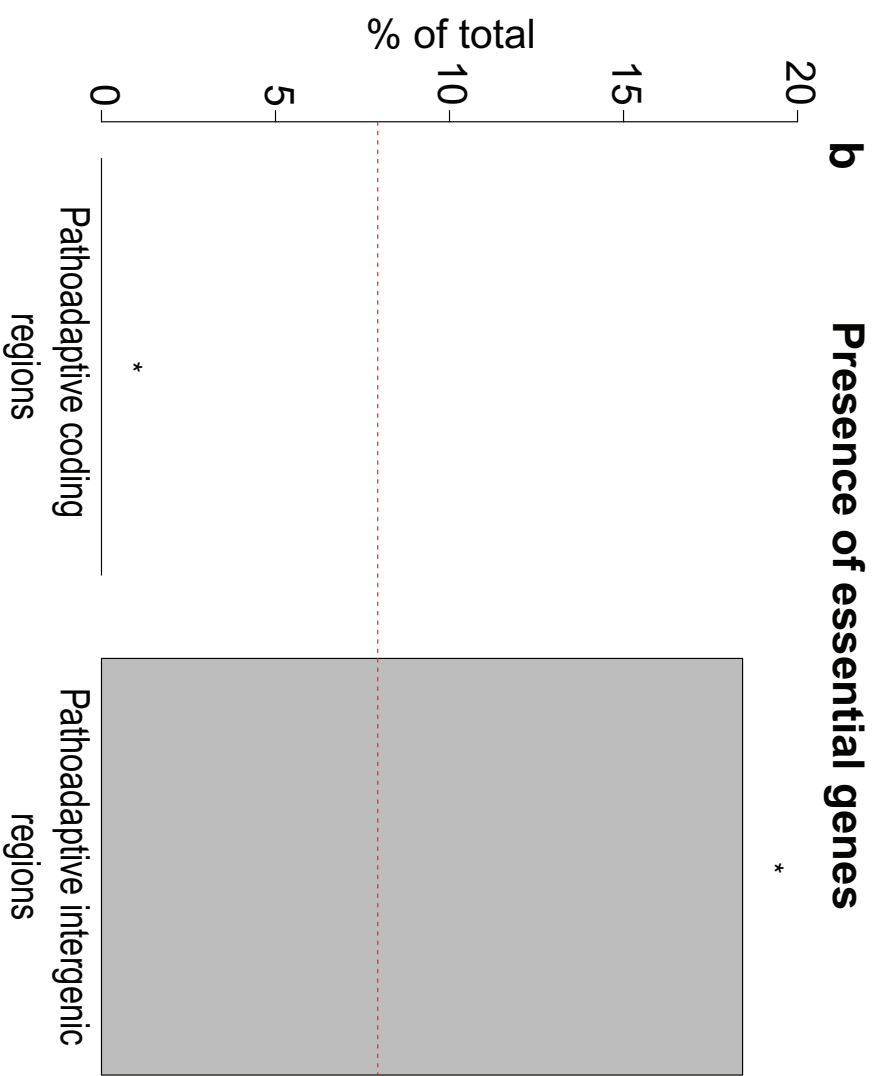

Source: https://www.biorxiv.org/content/10.1101/236000v1.full.pdf
